# Supplementary material for: Higher hemoglobin levels are an independent risk factor for adverse metabolism and higher mortality in a 20-year follow-up
Source: PubMed Central journal article supplement (PMC8497471; doi:10.1038/s41598-021-99217-9), 2021-10-07

## SUPPLEMENTAL MATERIAL

### **Higher hemoglobin levels are an independent risk factor for adverse metabolism and higher mortality in a 20-year follow-up**

Joona Tapio<sup>1</sup>, Hannu Vähänikkilä<sup>2</sup>, Y. Antero Kesäniemi<sup>3</sup>, Olavi Ukkola<sup>3,\*</sup>, Peppi Koivunen<sup>1,\*</sup>

<sup>1</sup>Biocenter Oulu and Faculty of Biochemistry and Molecular Medicine, Oulu Center for Cell-Matrix Research, University of Oulu, 90014 Oulu, Finland. 90014 Oulu, Finland.

<sup>2</sup>Northern Finland Birth Cohorts, Arctic Biobank, Infrastructure for Population Studies, Faculty of Medicine, University of Oulu, 90014 Oulu, Finland.

<sup>3</sup>Medical Research Center Oulu, Oulu University Hospital and Research Unit of Internal Medicine, University of Oulu, 90014 Oulu, Finland

\*To whom correspondence should be addressed: Peppi Koivunen, MD, PhD, Faculty of Biochemistry and Molecular Medicine, University of Oulu, P.O. Box 5400, FIN-90014 University of Oulu, Oulu, Finland, Email: [peppi.koivunen@oulu.fi](mailto:peppi.koivunen@oulu.fi), Tel. +358294485822 or Olavi Ukkola, MD, PhD, Faculty of Medicine, University of Oulu and Oulu University Hospital, P.O. Box 5000, FIN-90014 University of Oulu, Oulu, Finland, E-mail: [olavi.ukkola@oulu.fi](mailto:olavi.ukkola@oulu.fi), Tel. +35883154920.

## Supplemental tables

**Table S1. Characteristics of the OPERA study population.** Number of participants (N) in the statistical analyses. The numbers indicate mean for the variables used in the analysis. NA = not available. Hb, Hemoglobin; BMI, Body Mass Index; Bp, Blood Pressure; ABP, Ambulatore Blood Pressure; HDL, High-Density Lipoprotein; LDL, Low-Density Lipoprotein; HOMA-IR, Homeostatic Model Assessment For Insulin Resistance, OGTT, Oral Glucose Tolerance Test; AUC, Area Under The Curve.

| Variable               | Units             | Baseline     |       |         | Follow-up    |       |         |
|------------------------|-------------------|--------------|-------|---------|--------------|-------|---------|
|                        |                   | All subjects | Males | Females | All subjects | Males | Females |
| N                      |                   | 967          | 476   | 491     | 558          | 260   | 298     |
| Physical activity      | times per week    | 1.7          | 1.7   | 1.7     | NA           | NA    | NA      |
| Hb                     | g/L               | 143          | 151   | 135     | 140          | 147   | 135     |
| Age                    | years             | 51           | 51    | 52      | 72           | 72    | 72      |
| Smoking                | package years     | 10           | 15    | 5       | 11           | 17    | 5       |
| Alcohol consumption    | g/w               | 61           | 96    | 27      | 40           | 59    | 24      |
| BMI                    | kg/m <sup>2</sup> | 27.7         | 28.0  | 27.4    | 29.1         | 29.0  | 29.2    |
| Bp medication          | %                 | 48.3         | 51.3  | 53.2    | 78.3         | 80.4  | 76.5    |
| Lipid medication       | %                 | 2.9          | 3.6   | 2.2     | 48.9         | 50.4  | 47.7    |
| Lung disease           | %                 | 9.3          | 7.6   | 11      | 23.7         | 23.1  | 24.2    |
| Waist circumference    | cm                | 90.5         | 97.6  | 83.6    | 97.0         | 102.3 | 92.3    |
| Hip circumference      | cm                | 104.4        | 104.7 | 104.1   | 102.9        | 101.3 | 104.2   |
| WH ratio               | -                 | 0.87         | 0.93  | 0.80    | 0.94         | 1.00  | 0.89    |
| Systolic bp            | mmHg              | 148.1        | 151.2 | 145.1   | 138.2        | 137.2 | 139.0   |
| Diastolic bp           | mmHg              | 89.1         | 92.3  | 85.9    | 72.3         | 74.8  | 70.0    |
| Heart rate             | bpm               | 73.8         | 72.2  | 75.3    | 68.6         | 68.7  | 68.5    |
| ABP 24h systolic bp    | mmHg              | 130          | 131   | 129     | 133          | 133   | 132     |
| ABP 24h diastolic bp   | mmHg              | 81           | 83    | 79      | 72           | 74    | 71      |
| ABP 24h heart rate     | bpm               | 70           | 69    | 71      | 65           | 64    | 66      |
| ABP day systolic bp    | mmHg              | 135          | 136   | 133     | 134          | 135   | 134     |
| ABP day diastolic bp   | mmHg              | 85           | 87    | 83      | 74           | 75    | 72      |
| ABP day heart rate     | bpm               | 73           | 73    | 74      | 66           | 65    | 67      |
| ABP night systolic bp  | mmHg              | 117          | 117   | 116     | 124          | 125   | 123     |
| ABP night diastolic bp | mmHg              | 70           | 72    | 68      | 65           | 68    | 63      |
| ABP night heart rate   | bpm               | 62           | 61    | 63      | 61           | 60    | 61      |
| Total cholesterol      | mmol/L            | 5.7          | 5.8   | 5.7     | 4.8          | 4.6   | 4.9     |
| HDL cholesterol        | mmol/L            | 1.4          | 1.2   | 1.5     | 1.5          | 1.3   | 1.6     |
| LDL cholesterol        | mmol/L            | 3.5          | 3.7   | 3.4     | 2.9          | 2.9   | 2.9     |
| Triglycerides          | mmol/L            | 1.6          | 1.8   | 1.4     | 1.3          | 1.3   | 1.3     |
| HOMA-IR                | -                 | 3.0          | 3.6   | 2.5     | 3.8          | 4.2   | 3.5     |
| fb-Glucose             | mmol/L            | 4.7          | 4.9   | 4.6     | 5.8          | 5.8   | 5.7     |
| fs-Insulin             | mU/L              | 13.5         | 15.5  | 11.6    | 17.6         | 18.2  | 17.2    |
| 2h Glucose (OGTT)      | mmol/L            | 6.0          | 5.9   | 6.0     | 7.2          | 7.3   | 7.1     |
| AUC Glucose            | -                 | 13.0         | 13.5  | 12.5    | NA           | NA    | NA      |

|             |       |       |       |       |       |       |       |
|-------------|-------|-------|-------|-------|-------|-------|-------|
| AUC Insulin | -     | 141.9 | 150.1 | 134.0 | NA    | NA    | NA    |
| Leucocytes  | E9/L  | 5.9   | 6.1   | 5.7   | 5.8   | 6.1   | 6.0   |
| hsCRP       | mg/L  | 3.6   | 3.7   | 3.6   | 2.9   | 2.6   | 3.1   |
| Leptin      | ng/mL | 10.6  | 6.2   | 14.7  | 22.4  | 11.7  | 31.8  |
| Grelin      | pg/mL | 665.9 | 653.2 | 678.3 | 472.4 | 399.1 | 536.3 |
| Adiponectin | ug/mL | 15.9  | 13.8  | 17.9  | 15.4  | 13.0  | 17.6  |
| ALT         | U/I   | 31.8  | 37.0  | 26.8  | 26.7  | 28.4  | 25.2  |

**Table S2. Effect sizes for association of Hb levels with anthropometric measures, metabolic parameters and APB measurements at baseline and follow-up in males.** Number of participants (N) in the statistical analyses, correlations (*r*) in units of one standard deviation (1-SD) change in anthropometric, metabolic and ABP parameters per 1-SD change in Hb, lower and upper limit for 95% confidence intervals (CIL, CIU) and *p* values for the effect size estimate. ABP, Ambulatic Blood Pressure; BMI, Body Mass Index; Cx, circumference; Bp, Blood Pressure; OGTT, Oral Glucose Tolerance Test; HDL, High-Density Lipoprotein; LDL, Low-Density Lipoprotein; ALT, alanine aminotransferase.

| Parameter              | Baseline |          |       |       |          | Follow-up |          |       |       |          |
|------------------------|----------|----------|-------|-------|----------|-----------|----------|-------|-------|----------|
|                        | N        | <i>r</i> | CIL   | CIU   | <i>p</i> | N         | <i>r</i> | CIL   | CIU   | <i>p</i> |
| Weight                 | 476      | 0.24     | 0.15  | 0.32  | <0.0001  | 260       | 0.23     | 0.11  | 0.34  | 0.0002   |
| BMI                    | 476      | 0.25     | 0.16  | 0.33  | <0.0001  | 260       | 0.20     | 0.08  | 0.32  | 0.001    |
| Waist cx               | 476      | 0.23     | 0.14  | 0.31  | <0.0001  | 260       | 0.18     | 0.06  | 0.29  | 0.004    |
| Hip cx                 | 476      | 0.25     | 0.16  | 0.33  | <0.0001  | 260       | 0.14     | 0.02  | 0.25  | 0.027    |
| Systolic bp            | 476      | 0.15     | 0.06  | 0.23  | 0.001    | 260       | 0.09     | -0.03 | 0.21  | 0.16     |
| Diastolic bp           | 476      | 0.16     | 0.07  | 0.25  | 0.0004   | 260       | 0.26     | 0.14  | 0.37  | <0.0001  |
| Heart rate             | 446      | 0.13     | 0.03  | 0.22  | 0.01     | 260       | 0.11     | -0.01 | 0.23  | 0.081    |
| ABP 24h systolic bp    | 406      | 0.12     | 0.02  | 0.21  | 0.02     | 254       | 0.04     | -0.08 | 0.16  | 0.5      |
| ABP 24h diastolic bp   | 406      | 0.14     | 0.05  | 0.24  | 0.004    | 254       | 0.26     | 0.14  | 0.37  | <0.0001  |
| ABP 24h heart rate     | 406      | 0.11     | 0.01  | 0.20  | 0.03     | 254       | -0.04    | -0.16 | 0.09  | 0.57     |
| ABP day systolic bp    | 406      | 0.12     | 0.02  | 0.21  | 0.02     | 254       | 0.04     | -0.08 | 0.16  | 0.52     |
| ABP day diastolic bp   | 406      | 0.15     | 0.05  | 0.24  | 0.003    | 254       | 0.25     | 0.13  | 0.36  | <0.0001  |
| ABP day heart rate     | 406      | 0.10     | 0.00  | 0.19  | 0.052    | 254       | -0.02    | -0.14 | 0.11  | 0.77     |
| ABP night systolic bp  | 406      | 0.10     | 0.00  | 0.19  | 0.052    | 249       | 0.00     | -0.13 | 0.12  | 0.99     |
| ABP night diastolic bp | 406      | 0.11     | 0.01  | 0.20  | 0.03     | 249       | 0.18     | 0.05  | 0.29  | 0.005    |
| ABP night heart rate   | 405      | 0.12     | 0.02  | 0.21  | 0.02     | 249       | -0.10    | -0.22 | 0.02  | 0.11     |
| Fasting glucose        | 446      | 0.09     | 0.00  | 0.18  | 0.06     | 187       | 0.23     | 0.09  | 0.36  | 0.002    |
| Fasting insulin        | 446      | 0.23     | 0.14  | 0.31  | <0.0001  | 260       | 0.13     | 0.00  | 0.24  | 0.04     |
| 2h glucose (OGTT)      | 465      | 0.05     | -0.04 | 0.14  | 0.25     | 187       | 0.10     | -0.04 | 0.24  | 0.17     |
| 2h insulin (OGTT)      | 464      | 0.18     | 0.09  | 0.26  | <0.0001  | 188       | 0.28     | 0.14  | 0.41  | <0.0001  |
| Total cholesterol      | 476      | 0.10     | 0.01  | 0.19  | 0.03     | 260       | 0.18     | 0.06  | 0.30  | 0.003    |
| Triglycerides          | 476      | 0.22     | 0.13  | 0.30  | <0.0001  | 260       | 0.08     | -0.04 | 0.20  | 0.21     |
| HDL cholesterol        | 476      | -0.17    | -0.26 | -0.09 | <0.0001  | 260       | -0.02    | -0.15 | 0.10  | 0.70     |
| LDL cholesterol        | 476      | 0.06     | -0.03 | 0.15  | 0.22     | 260       | 0.23     | 0.11  | 0.34  | <0.0001  |
| Leucocytes             | 476      | 0.17     | 0.09  | 0.26  | <0.0001  | 260       | 0.02     | -0.10 | 0.14  | 0.71     |
| Leptin                 | 446      | 0.20     | 0.11  | 0.29  | <0.0001  | 260       | -0.01    | -0.13 | 0.11  | 0.83     |
| Ghrelin                | 474      | -0.08    | -0.17 | 0.01  | 0.09     | 260       | -0.27    | -0.38 | -0.15 | <0.0001  |
| Adiponectin            | 475      | -0.14    | -0.22 | -0.05 | 0.003    | 260       | -0.17    | -0.28 | -0.05 | 0.006    |
| ALT                    | 475      | 0.23     | 0.14  | 0.31  | <0.0001  | 260       | 0.34     | 0.22  | 0.44  | <0.0001  |

**Table S3. Effect sizes for association of Hb levels with anthropometric measures, metabolic parameters and APB measurements at baseline and follow-up in females.** Number of participants (N) in the statistical analyses, correlations (*r*) in units of one standard deviation (1-SD) change in anthropometric, metabolic and ABP parameters per 1-SD change in Hb, lower and upper limit for 95% confidence intervals (CIL, CIU) and *p* values for the effect size estimate. ABP, Ambulatic Blood Pressure; BMI, Body Mass Index; Cx, circumference; Bp, Blood Pressure; OGTT, Oral Glucose Tolerance Test; HDL, High-Density Lipoprotein; LDL, Low-Density Lipoprotein; ALT, alanine aminotransferase.

| Baseline<br>Parameter  |     |          |       |       |          | Follow-up |          |       |       |          |
|------------------------|-----|----------|-------|-------|----------|-----------|----------|-------|-------|----------|
|                        | N   | <i>r</i> | CIL   | CIU   | <i>p</i> | N         | <i>r</i> | CIL   | CIU   | <i>p</i> |
| Weight                 | 491 | 0.24     | 0.16  | 0.32  | <0.0001  | 298       | 0.00     | -0.11 | 0.12  | 0.96     |
| BMI                    | 491 | 0.25     | 0.16  | 0.33  | <0.0001  | 298       | -0.02    | -0.13 | 0.10  | 0.79     |
| Waist cx               | 489 | 0.27     | 0.18  | 0.35  | <0.0001  | 297       | -0.02    | -0.14 | 0.09  | 0.69     |
| Hip cx                 | 489 | 0.22     | 0.13  | 0.30  | <0.0001  | 298       | -0.02    | -0.14 | 0.09  | 0.70     |
| Systolic bp            | 491 | 0.18     | 0.10  | 0.27  | <0.0001  | 298       | 0.01     | -0.10 | 0.12  | 0.87     |
| Diastolic bp           | 491 | 0.20     | 0.11  | 0.28  | <0.0001  | 298       | 0.15     | 0.04  | 0.26  | 0.01     |
| Heart rate             | 491 | 0.08     | -0.01 | 0.16  | 0.09     | 298       | 0.07     | -0.04 | 0.18  | 0.23     |
| ABP 24h systolic bp    | 427 | 0.15     | 0.05  | 0.24  | 0.002    | 270       | -0.07    | -0.18 | 0.05  | 0.28     |
| ABP 24h diastolic bp   | 427 | 0.13     | 0.04  | 0.23  | 0.01     | 270       | 0.08     | -0.04 | 0.20  | 0.18     |
| ABP 24h heart rate     | 427 | 0.11     | 0.01  | 0.20  | 0.03     | 270       | -0.07    | -0.19 | 0.05  | 0.26     |
| ABP day systolic bp    | 427 | 0.15     | 0.05  | 0.24  | 0.003    | 270       | -0.06    | -0.18 | 0.06  | 0.32     |
| ABP day diastolic bp   | 427 | 0.12     | 0.03  | 0.22  | 0.01     | 270       | 0.10     | -0.02 | 0.22  | 0.10     |
| ABP day heart rate     | 427 | 0.10     | 0.00  | 0.19  | 0.04     | 270       | -0.05    | -0.17 | 0.07  | 0.39     |
| ABP night systolic bp  | 424 | 0.14     | 0.04  | 0.23  | 0.004    | 254       | -0.03    | -0.16 | 0.09  | 0.60     |
| ABP night diastolic bp | 424 | 0.11     | 0.02  | 0.21  | 0.02     | 254       | 0.04     | -0.08 | 0.16  | 0.52     |
| ABP night heart rate   | 424 | 0.14     | 0.05  | 0.24  | 0.003    | 254       | -0.12    | -0.24 | 0.00  | 0.06     |
| Fasting glucose        | 491 | 0.15     | 0.06  | 0.23  | 0.001    | 226       | 0.16     | 0.03  | 0.28  | 0.02     |
| Fasting insulin        | 491 | 0.25     | 0.16  | 0.33  | <0.0001  | 298       | 0.01     | -0.11 | 0.12  | 0.92     |
| 2h glucose (OGTT)      | 485 | 0.14     | 0.05  | 0.22  | 0.002    | 226       | 0.30     | 0.17  | 0.41  | <0.0001  |
| 2h insulin (OGTT)      | 482 | 0.18     | 0.09  | 0.26  | 0.0001   | 225       | 0.18     | 0.05  | 0.31  | 0.006    |
| Total cholesterol      | 491 | 0.03     | -0.06 | 0.12  | 0.46     | 298       | 0.11     | 0.00  | 0.22  | 0.06     |
| Triglycerides          | 491 | 0.11     | 0.02  | 0.20  | 0.01     | 298       | 0.05     | -0.06 | 0.16  | 0.39     |
| HDL cholesterol        | 491 | -0.10    | -0.19 | -0.01 | 0.03     | 298       | -0.02    | -0.13 | 0.10  | 0.78     |
| LDL cholesterol        | 491 | 0.05     | -0.04 | 0.14  | 0.24     | 298       | 0.11     | 0.00  | 0.22  | 0.05     |
| Leucocytes             | 491 | 0.23     | 0.14  | 0.31  | <0.0001  | 298       | 0.13     | 0.02  | 0.24  | 0.02     |
| Leptin                 | 488 | 0.22     | 0.13  | 0.30  | <0.0001  | 297       | -0.02    | -0.13 | 0.10  | 0.75     |
| Ghrelin                | 490 | -0.11    | -0.20 | -0.02 | 0.02     | 298       | -0.03    | -0.15 | 0.08  | 0.57     |
| Adiponectin            | 488 | -0.15    | -0.24 | -0.06 | 0.001    | 297       | -0.14    | -0.25 | -0.03 | 0.02     |
| ALT                    | 490 | 0.23     | 0.15  | 0.32  | <0.0001  | 298       | 0.12     | 0.00  | 0.23  | 0.04     |

**Table S4. Mean hemoglobin (Hb) levels of the subjects with no fat in the liver and subjects with fat in the liver.** Number of participants (N) in the statistical analyses, mean Hb levels (g/L), standard deviation (STDEV, g/L), standard error of the mean (SEM, g/L), and *p* values for the difference between the groups. Hb, hemoglobin.

| Group               | N   | Mean Hb | STDEV | SEM  | <i>p</i> |
|---------------------|-----|---------|-------|------|----------|
| No fat in the liver | 697 | 140.8   | 11.1  | 0.42 |          |
| Fat in the liver    | 256 | 147.3   | 10.7  | 0.67 | <0.0001  |

**Table S5. Mean baseline hemoglobin (Hb) levels of normoglycemic subjects according to glucose tolerance status at the 20-year follow-up.** Number of participants (N) in the statistical analyses, mean Hb levels (g/L), standard deviation (STDEV, g/L) and adjusted *p* value for the difference between the groups. Alcohol consumption, smoking, BMI, sex and age were included as covariates.

| Group                           | N   | Mean Hb | STDEV | <i>p</i> |
|---------------------------------|-----|---------|-------|----------|
| <b>Baseline</b>                 |     |         |       |          |
| Normoglycemic                   | 437 | 141.3   | 11.2  |          |
| <b>Follow-up</b>                | 437 | 141.1   | 14.3  |          |
| Normoglycemic (reference group) | 210 | 139.3   | 11.0  |          |
| IGF or IGT                      | 129 | 142.6   | 11.2  | 0.008    |
| Diabetes                        | 98  | 143.7   | 10.8  | 0.001    |

**Table S6. Total deaths, CVD-related deaths and CVD events in each Hb quartile during the 20-year follow-up.** Number of participants (N) in the statistical analyses. Hb, hemoglobin; CVD, cardiovascular disease.

|                    | Hb quartile 1 | Hb quartile 2 | Hb quartile 3 | Hb quartile 4 | Total |
|--------------------|---------------|---------------|---------------|---------------|-------|
| N                  | 227           | 209           | 211           | 181           | 828   |
| Deaths             | 50            | 47            | 46            | 70            | 213   |
| CVD-related deaths | 12            | 16            | 17            | 25            | 70    |
| CVD events         | 53            | 66            | 50            | 64            | 233   |



**Table S7. Events recorded per 100 person-years.** Mean values for events recorded per 100 person-years in the study. SEM = Standard Error of the Mean, n = Number of participants in the statistical analyses.

|                 | <b>Hb quartile 1</b> |      |     | <b>Hb quartile 2</b> |      |     | <b>Hb quartile 3</b> |      |     | <b>Hb quartile 4</b> |      |     | <b>All subjects</b> |      |     |
|-----------------|----------------------|------|-----|----------------------|------|-----|----------------------|------|-----|----------------------|------|-----|---------------------|------|-----|
| <b>All</b>      | Mean                 | SEM  | n   | Mean                 | SEM  | n   | Mean                 | SEM  | n   | Mean                 | SEM  | n   | Mean                | SEM  | n   |
| Total mortality | 0,89                 | 0,13 | 264 | 0,93                 | 0,14 | 240 | 0,90                 | 0,13 | 240 | 1,56                 | 0,19 | 223 | 1,05                | 0,07 | 967 |
| CVD mortality   | 0,21                 | 0,06 | 264 | 0,32                 | 0,08 | 240 | 0,33                 | 0,08 | 240 | 0,56                 | 0,11 | 223 | 0,35                | 0,04 | 967 |
| CVD events      | 0,95                 | 0,13 | 264 | 1,30                 | 0,16 | 240 | 0,96                 | 0,14 | 240 | 1,40                 | 0,18 | 223 | 1,14                | 0,07 | 967 |
| <b>Men</b>      | Mean                 | SEM  | n   | Mean                 | SEM  | n   | Mean                 | SEM  | n   | Mean                 | SEM  | n   | Mean                | SEM  | n   |
| Total mortality | 1,43                 | 0,23 | 130 | 1,10                 | 0,21 | 116 | 1,17                 | 0,22 | 117 | 1,89                 | 0,29 | 113 | 1,39                | 0,12 | 476 |
| CVD mortality   | 0,41                 | 0,12 | 130 | 0,49                 | 0,14 | 116 | 0,44                 | 0,13 | 117 | 0,70                 | 0,18 | 113 | 0,51                | 0,07 | 476 |
| CVD events      | 1,39                 | 0,23 | 130 | 1,91                 | 0,28 | 116 | 1,29                 | 0,23 | 117 | 1,67                 | 0,27 | 113 | 1,56                | 0,13 | 476 |
| <b>Women</b>    | Mean                 | SEM  | n   | Mean                 | SEM  | n   | Mean                 | SEM  | n   | Mean                 | SEM  | n   | Mean                | SEM  | n   |
| Total mortality | 0,41                 | 0,12 | 134 | 0,76                 | 0,17 | 124 | 0,64                 | 0,16 | 123 | 1,22                 | 0,23 | 110 | 0,73                | 0,08 | 491 |
| CVD mortality   | 0,03                 | 0,03 | 134 | 0,15                 | 0,08 | 124 | 0,23                 | 0,09 | 123 | 0,41                 | 0,14 | 110 | 0,19                | 0,04 | 491 |
| CVD events      | 0,55                 | 0,14 | 134 | 0,73                 | 0,17 | 124 | 0,64                 | 0,16 | 123 | 1,13                 | 0,23 | 110 | 0,74                | 0,08 | 491 |

## Supplemental figures

**Figure S1. Flow-chart representing the study population and analyses done.** Number of participants (n) in the statistical analyses. OPERA, Oulu Project Elucidating Risk of Atherosclerosis; Hb, hemoglobin; bl, baseline; fu, follow-up; ABP, ambulatory blood pressure; IGT, impaired glucose tolerance; IFG, impaired fasting glucose; T2DM, type 2 diabetes; CVD, cardiovascular disease.

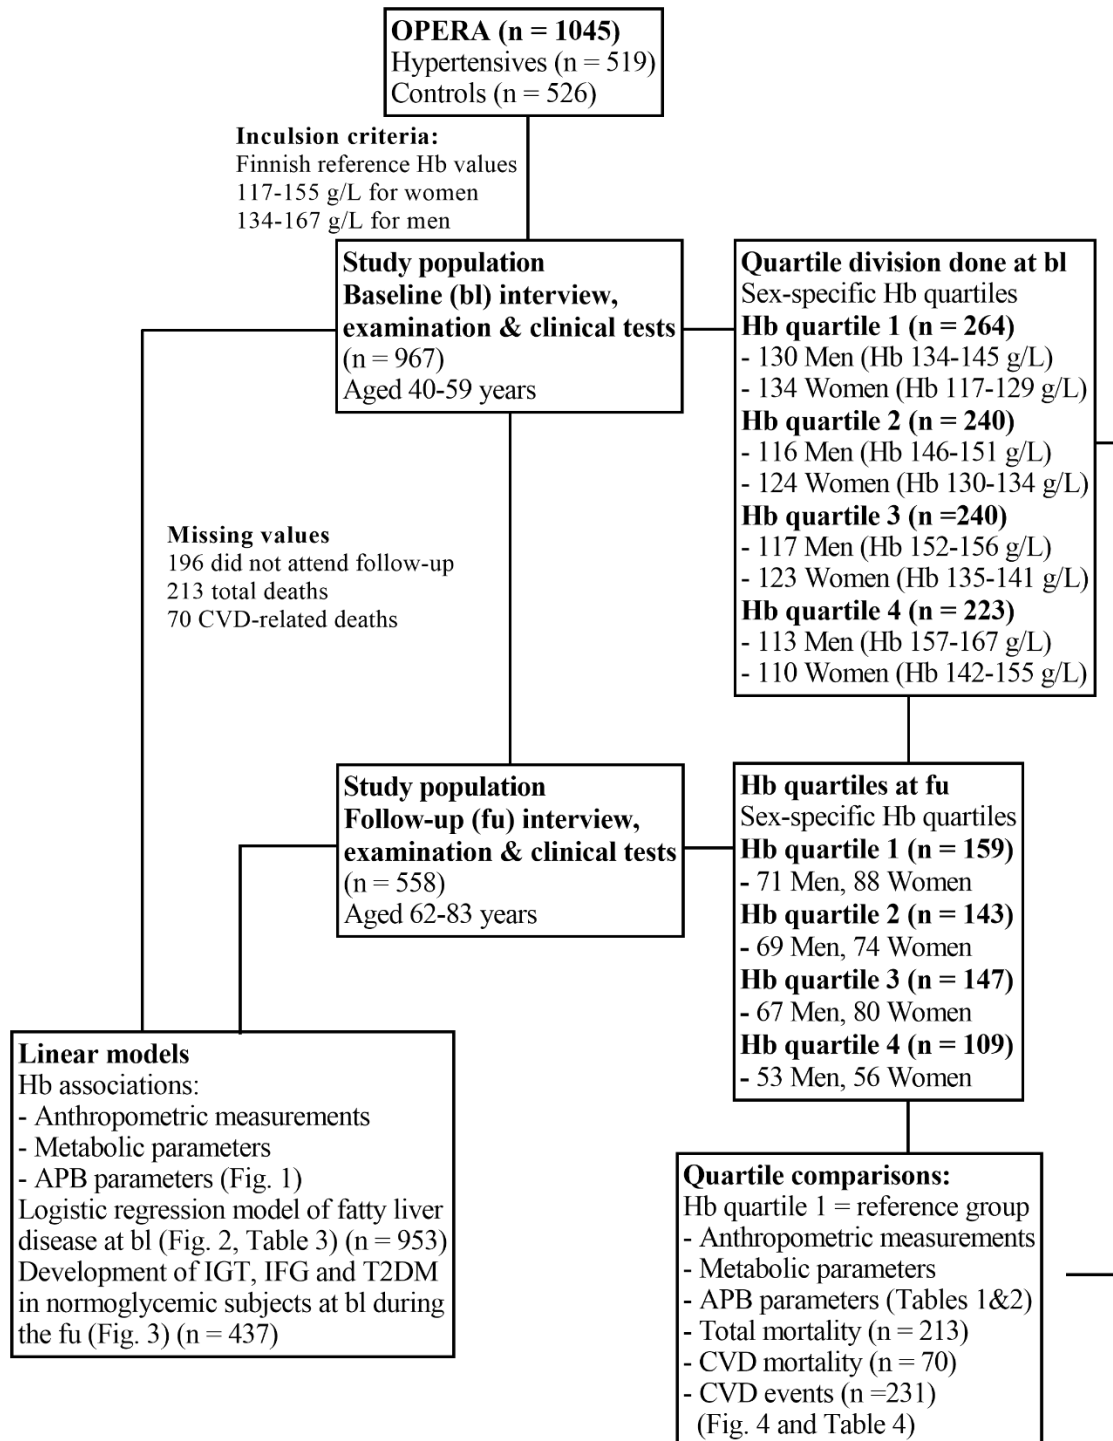

**Figure S2. Sex-specific survival probability according to Hb quartiles.** Kaplan-Meier graphs representing survival probabilities for CVD events (A = men (n=154), B = women (n=77)), CVD-related mortality (C = men (n=50), D = women(n=20)) and total mortality (E = men (n=137), F = women (n=76)) in each sex-specific Hb quartile. Hb quartile 1 has the lowest and Hb quartile 4 the highest Hb levels. Hb, hemoglobin.

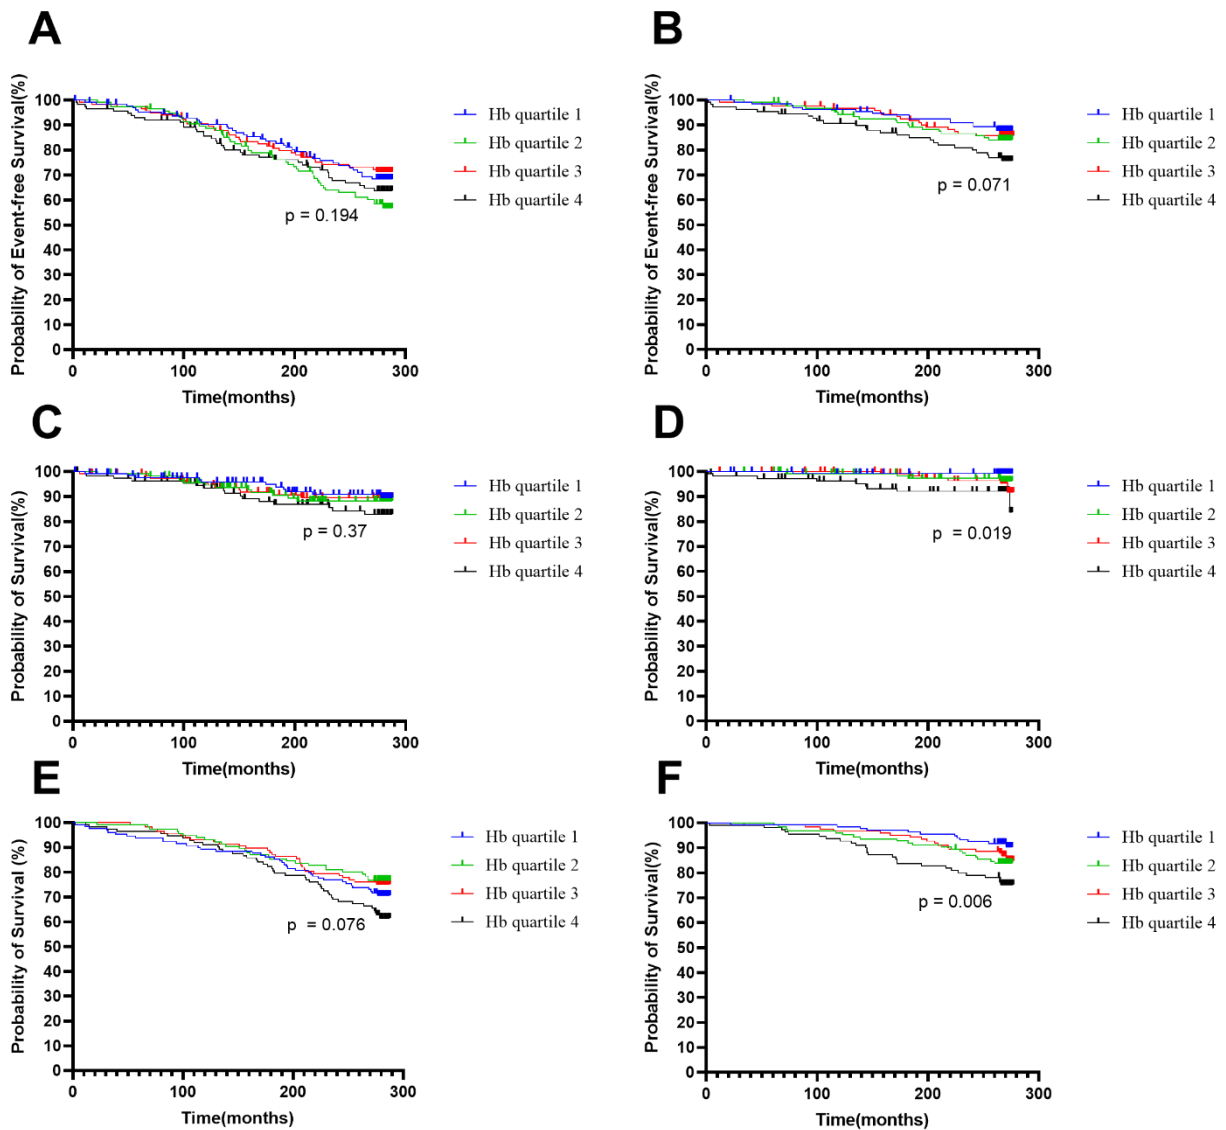

**Figure S3. Total mortality, CVD mortality and CVD Events per 100 person-years. A = all subjects, B = men, C = women. Hb = hemoglobin.**

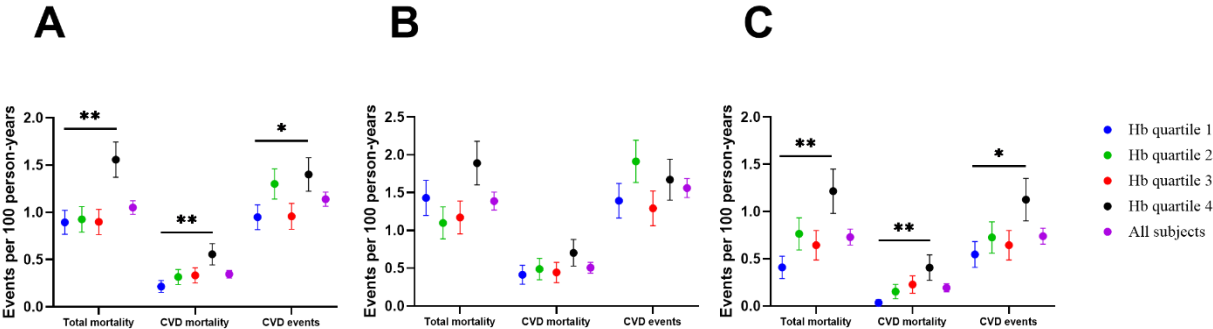

Supplement: 41598_2021_99217_MOESM1_ESM.pdf [file 41598_2021_99217_MOESM1_ESM.pdf]
